# Supplementary material
Source: PubMed Central journal article supplement (PMC2829896)
Supplement: SD1.pdf [file SD1.pdf]

SUPPLEMENTAL TABLE 1  
*In vitro* effects of antimalarial drugs on microfilaria (all filarial species)\*

| Drug                  | Parasite                   | Concentration†      | Results                                                                           | Reference |
|-----------------------|----------------------------|---------------------|-----------------------------------------------------------------------------------|-----------|
| Chloroquine           | <i>Onchocerca volvulus</i> | Not specified       | No effect                                                                         | 30        |
|                       | <i>O. volvulus</i>         | 0.4–100 µg/mL, 7 h  | TBI inversely related with concentration: 0.4–4 µg/mL: ≤ 7 h; 100 µg/mL: ≤ 15 min | 31        |
|                       | <i>Brugia patei</i>        | 10 µM               | No effect on motility                                                             | 37        |
| Amodiaquine           | <i>Breinlia booliati</i>   | 20 µM, 8 h          | TBI = 3 h (all control mf motile at 8 h)                                          | 40        |
| Amodiaquine congeners | <i>B. booliati</i>         | 20 µM, 8 h          | TBI = 3–7 h (all control mf motile at 8 h)                                        | 40        |
| Mefloquine            | <i>B. patei</i>            | 2, 5, or 10 µM, 4 d | TBI inversely related with concentration: 2 µM: ≤ 3 d; 5 µM: ≤ 2 d; 10µM: ≤ 10 h) | 37        |

\*All studies included control parasites (not exposed to the drug). In all studies, the effect was assessed by follow-up of motility of microfilariae. h = hours; TBI = time before immobilization of all microfilaria; mf = microfilaria; min = minutes; d = days.  
† Concentration (in µg/mL or in µM) and duration of follow-up.

SUPPLEMENTAL TABLE 2  
*In vitro* effects of chloroquine on adult filariae (all species)\*

| Parasite                         | Concentration†                                 | Assessment method‡                                                                                                           | Results                                                                                                        | Reference |
|----------------------------------|------------------------------------------------|------------------------------------------------------------------------------------------------------------------------------|----------------------------------------------------------------------------------------------------------------|-----------|
| <i>Onchocerca volvulus</i>       | 12–120 µg/mL                                   | Motility                                                                                                                     | 12 µg/mL: longevity reduced by 65%, 120 µg/mL: all worms dead within 1 h                                       | 31        |
| <i>O. volvulus</i> ♀             | 10 µM, 72 h                                    | Microscopic (MI at 0, 24, 48, and 72 h)                                                                                      | Marked paralyzing effect (>> <i>B. pahangi</i> , <i>D. immitis</i> , and <i>A. vitae</i> )                     | 20        |
| <i>O. volvulus</i> ♂             | 0.3, 0.5, 1.0, and 2.0 µg/mL, 48 h             | Motility meter and MTT assay                                                                                                 | Marked paralyzing effect and inhibition of formazan formation                                                  | 35        |
| <i>O. gutturosa</i> ♂            | 50 µM and then 1 in 4 dilutions, 7 d           | Microscope (MS every 30 min for the first 4.5 h, then at 1, 2, 3, 4, and 7 d and IC <sub>50</sub> on days 1, 2, 3, 4, and 7) | IC <sub>50</sub> at 1, 3, and 4 d > 50 µM; IC <sub>50</sub> at 2 d = 11.8 µM; IC <sub>50</sub> at 7 d = 6.7 µM | 32        |
| <i>O. gutturosa</i> ♂            | 0.05 µM–20 mM, 72 h                            | Motility meter (MI at 0, 1, 3, 6, 12, 24, 48, and 72 h and IC <sub>50</sub> at 24 h)                                         | Marked paralyzing effect (> <i>B. pahangi</i> and <i>A. vitae</i> ): IC <sub>50</sub> at 24 h = 2.9 µM         | 33        |
| <i>O. gutturosa</i> ♂            | 10 µM, 72 h                                    | Motility meter (MI at 0, 24, 48, and 72 h)                                                                                   | Marked paralyzing effect (>> <i>B. pahangi</i> , <i>D. immitis</i> , and <i>A. vitae</i> )                     | 20        |
| <i>Brugia pahangi</i> ♀          | 0.05 µM–20 mM, 72 h                            | Motility meter (MI at 0, 1, 3, 6, 12, 24, 48, and 72 h and IC <sub>50</sub> at 24 h)                                         | Moderate paralyzing effect (< <i>O. gutturosa</i> ): IC <sub>50</sub> at 24 h = 25 µM                          | 33        |
| <i>B. pahangi</i> ♀              | 0.032, 0.1, 0.32, 1.0, 3.2, 10, or 32 µM, 72 h | Motility-meter (MI at 0, 24, 48, and 72 h and IC <sub>50</sub> at 24 and 72 h) Lactate excretion (24, 48, and 72 h)          | Moderate paralyzing effect (IC <sub>50</sub> at 24 h > 32 µM; at 72 h = 2.3 µM), Reduced lactate excretion     | 20        |
| <i>B. patei</i>                  | 10 µM                                          | Microscope and lactate excretion                                                                                             | No effect on motility and survival                                                                             | 37        |
| <i>Dirofilaria immitis</i> ♀     | 10 µM, 72 h                                    | Microscope (MI at 0, 24, 48, and 72 h)                                                                                       | No paralyzing effect                                                                                           | 20        |
| <i>Acanthocheilonema vitae</i> ♀ | 0.05 µM–20 mM, 72 h                            | Motility meter (MI at 0, 1, 3, 6, 12, 24, 48, and 72 h and IC <sub>50</sub> at 24 h)                                         | Low paralyzing effect: IC <sub>50</sub> at 24 h = 74 µM                                                        | 33        |
| <i>A. vitae</i> ♀                | 10 µM, 72 h                                    | Motility meter (MI at 0, 24, 48, and 72 h)                                                                                   | Sensitivity similar to that of <i>B. pahangi</i>                                                               | 20        |

\*All assays included control worms. h = hours; MI = motility index (percentage of the motility of time-matched control parasites); MTT assay = viability assessed by the rate of reduction of MTT tetrazolium salt to formazan; MS = motility score on a scale of 0 (completely immotile) to 10 (normal); min = minutes; IC<sub>50</sub> = concentration needed to reduce motility by 50%; d = days.  
† Concentration (in µg/mL or in µM) and duration of follow-up.  
‡ Methods used to measure motility and express data.

SUPPLEMENTAL TABLE 3  
*In vitro* effects of 4-amino-quinolines (except chloroquine) on adult filariae (all species)\*

| Drug                  | Parasite                 | Concentration†                                 | Assessment method‡                                                                                       | Results                                                                                                              | Reference |
|-----------------------|--------------------------|------------------------------------------------|----------------------------------------------------------------------------------------------------------|----------------------------------------------------------------------------------------------------------------------|-----------|
| Amodiaquine           | <i>Brugia pahangi</i> ♀  | 0.032, 0.1, 0.32, 1.0, 3.2, 10, or 32 µM, 72 h | Motility meter (MI at 0, 24, 48, and 72 h and IC <sub>50</sub> at 24 and 72 h), Lactate excretion (72 h) | Marked paralyzing effect (IC <sub>50</sub> at 24 h = 15 µM; at 72 h = 0.2 µM), Marked reduction in lactate excretion | 20        |
|                       | <i>Breinlia booliati</i> | 20 µM, 8 h                                     | Motility (TBI)                                                                                           | TBI = 3 h (all controls motile at 8 h)                                                                               | 40        |
| Amodiaquine congeners | <i>B. booliati</i>       | 20 µM, 8 h                                     | Motility (TBI)                                                                                           | TBI = 3–7 h (all controls motile at 8 h)                                                                             | 40        |
| Quinacrine            | <i>B. pahangi</i> ♀      | 0.032, 0.1, 0.32, 1.0, 3.2, 10, or 32 µM, 72 h | Motility meter (MI at 0, 24, 48, and 72 h and IC <sub>50</sub> at 24 and 72 h), Lactate excretion (72 h) | Moderate paralyzing effect (IC <sub>50</sub> at 24 h = 2.4 µM; at 72 h = 1.9 µM), Reduced lactate excretion          | 20        |

\*All assays included control worms. h = hours; MI = motility index (percentage of the motility of time-matched control parasites); IC<sub>50</sub> = concentration needed to reduce motility by 50%; TBI = time before immobilization of all parasites.  
† Concentration (in µg/mL or in µM) and duration of follow-up.  
‡ Methods used to measure motility and express data.

SUPPLEMENTAL TABLE 4  
*In vitro* effects of quinine, mefloquine, and primaquine on adult filariae (all species)\*

| Drug       | Parasite                      | Concentration†                                            | Assessment method‡                                                                                                  | Results                                                                                                                                                                                                                                                   | Reference |
|------------|-------------------------------|-----------------------------------------------------------|---------------------------------------------------------------------------------------------------------------------|-----------------------------------------------------------------------------------------------------------------------------------------------------------------------------------------------------------------------------------------------------------|-----------|
| Quinine    | <i>Brugia pahangi</i> ♀       | 0.032, 0.1, 0.32, 1.0, 3.2, 10, or 32 µM, 72 h            | Motility meter (MI at 0, 24, 48 and 72 h and IC <sub>50</sub> at 24 and 72 h), Lactate excretion (72 h)             | Low paralyzing effect (IC <sub>50</sub> at 24 h > 32 µM; at 72 h = 15 µM). No reduction in lactate excretion                                                                                                                                              | 20        |
| Mefloquine | <i>Onchocerca gutturosa</i> ♂ | 3.13 µM, 7 d                                              | Microscopic (MS every 30 min for the first 4.5 hours, then at 1, 2, 3, 4 and 7 d) and MTT assay                     | From 24 h, mean MS < 5 (vs. 9–10 for controls), Significant inhibition of formazan formation                                                                                                                                                              | 49        |
|            | <i>B. malayi</i>              | 1, 2, 5, or 10 µM, 14 d medium with or without FCS and HS | Microscopic                                                                                                         | No FCS plus HS: concentration-related paralyzing effect: TBI for 1, 2, 5 and 10 µM = ≤ 4 d, ≤ 3 d; ≤ 1 d and ≤ 10 h, respectively; With FCS plus HS: no paralyzing effect (for 2 weeks)                                                                   | 37        |
|            | <i>B. patei</i>               | 1, 2, 5, or 10 µM, 14 d                                   | Microscopic, Lactate excretion (at 4, 9, 22 and 26 h)                                                               | No FCS plus HS: concentration-related paralyzing effect: TBI for 1, 2, 5 and 10 µM = ≤ 4 d, ≤ 3 d; ≤ 1 d and ≤ 10 h, respectively; Decrease in lactate excretion inversely related to concentration, With FCS plus HS: no paralyzing effect (for 2 weeks) | 37        |
| Primaquine | <i>B. pahangi</i> ♀           | 0.032, 0.1, 0.32, 1.0, 3.2, 10, or 32 µM, 72 h            | Motility meter (MI at 0, 24, 48 and 72 h and IC <sub>50</sub> at 24 and 72 h), Lactate excretion (24, 48, and 72 h) | Marked paralyzing effect (IC <sub>50</sub> at 24 h = 13 µM; at 72 h = 0.19 µM), Marked reduction in lactate excretion                                                                                                                                     | 20        |

\* All assays included control worms. h = hours; MI = motility index (percentage of the motility of control parasites); IC<sub>50</sub> = concentration needed to reduce motility by 50%; d = days; MS = motility score on a scale of 0 (completely immotile) to 10 (normal); min = minutes; FCS = 10% fetal calf serum; HS = 5% human serum; TBI = time before immobilization of all parasites.  
† Concentration (in µg/mL or in µM) and duration of follow-up.  
‡ Methods used to measure motility and express data.

SUPPLEMENTAL TABLE 5  
*In vivo* effects of antimalarial drugs on microfilarial loads (all filarial species)\*

| Drug                         | Parasite                       | Host†                             | Dose‡                                              | C§  | Time points of follow-up¶                               | Results                                                                                  | Reference |
|------------------------------|--------------------------------|-----------------------------------|----------------------------------------------------|-----|---------------------------------------------------------|------------------------------------------------------------------------------------------|-----------|
| Chloroquine                  | <i>Onchocerca volvulus</i>     | Humans (39)                       | 25 mg/kg over 3 d                                  | No  | Probably D1                                             | Significant reduction (38%)                                                              | 12        |
|                              | <i>O. volvulus</i>             | Humans (48)                       | 2,500 mg over 3 d                                  | Yes | D7, 14, 21, 28, 35                                      | MFL = 0 on D7 then reincrease to initial levels on D28                                   | 13        |
|                              | <i>O. volvulus</i>             | Humans (46)                       | 2,500 mg over 2–3 d, then 500 mg/week for 27 weeks | Yes | W4, 8, 16, 21, 28, 52                                   | Decrease up to week 20 (50% reduction), then remained stable                             | 13        |
|                              | <i>Dirofilaria immitis</i>     | Dogs (12)                         | 6 mg/kg, 1 im dose                                 | No  | Min 30, 60, 90, 120                                     | Marked rise within 30 min post-injection                                                 | 38        |
| Amodiaquine                  | <i>O. volvulus</i>             | Humans (8)                        | 1,800–3,000 mg over 3–10 d                         | No  | D30, 180, 365, 730                                      | No significant change                                                                    | 41        |
|                              | <i>Wuchereria bancrofti</i>    | Humans (9)                        | 600–2,400 mg over 1–4 d                            | No  | Repeated measures up to 7 mo. (no dates)                | Little change except in patient treated with 2,400 mg: gradual decrease to 0 after 7 mo. | 15        |
|                              | <i>W. bancrofti</i>            | Humans (14)                       | 600 mg/d × 15 d                                    | No  | D1, D30, and monthly up to 11 mo.                       | No significant change                                                                    | 42        |
|                              | <i>Litomosoides carinii</i>    | <i>Meriones unguiculatus</i> (27) | 25–100 mg/kg/d × 5 d                               | Yes | 1, 4, 7, 8, 11, and 15 d after first dose               | No clear change                                                                          | 43        |
|                              | <i>L. carinii</i>              | <i>Sigmodon hispidus</i> (5)      | 100 mg/kg/d × 5 d                                  | Yes | 1, 4, 7, 8, 11, and 15 d after first dose               | No clear change                                                                          | 43        |
|                              | <i>L. carinii</i>              | <i>Mastomys natalensis</i> (15)   | 25–100 mg/kg/d × 5 d                               | Yes | 3, 7, 14, 21, 42, 70, and 100 d after first dose        | Decrease up to D100 (= in controls)                                                      | 44        |
| Amodiaquine congeners        | <i>L. carinii</i>              | <i>M. unguiculatus</i>            | 25–100 mg/kg/d × 5 d                               | Yes | Repeated measures up to 15 d after the first dose       | No effect                                                                                | 47        |
|                              | <i>L. carinii</i>              | <i>M. natalensis</i>              | 100 mg/kg/d × 5 d, po or sc                        | Yes | Not specified                                           | No effect                                                                                | 40        |
| 4-aminoquinoline derivatives | <i>Acanthocheilonema vitae</i> | <i>M. natalensis</i>              | 200 mg/kg/d × 5 days                               | Yes | Not specified                                           | Reduction for 3 compounds                                                                | 48        |
| Quinacrine                   | <i>O. volvulus</i>             | Humans (6)                        | 200 mg/d × 5 or 7 d                                | No  | D30, D120, D180, D365, D540, D730                       | No effect                                                                                | 46        |
| Primaquine                   | <i>W. bancrofti</i>            | Humans (5)                        | 15 mg/d × 5 days                                   | No  | D1, D2, D3; then monthly up to 11 mo., and after 22 mo. | Reduction from 6 months; 0 or low counts after 12 mo                                     | 50        |

\* d = days; MFL = microfilarial load; mo = months.

† Values in parentheses are numbers of treated hosts.

‡ Treatment given orally (po) except when specified. im = intramuscular; sc = subcutaneous.

§ C = controlled trial (Yes) vs. non-controlled trial (No)

¶ Pretreatment MFL measured in all studies. Min = minutes; D = days; W = weeks.

SUPPLEMENTAL TABLE 6  
*In vivo* effects of antimalarial drugs on adult filariae (all species)\*

| Drug                         | Parasite                       | Host†                             | Dose‡                                              | C§  | Assessment¶                                                    | Results                                                                   | References |
|------------------------------|--------------------------------|-----------------------------------|----------------------------------------------------|-----|----------------------------------------------------------------|---------------------------------------------------------------------------|------------|
| Chloroquine                  | <i>Onchocerca volvulus</i>     | Humans                            | 2,500 mg over 3 d                                  | Yes | Histologic, D210                                               | No visible change                                                         | 13         |
|                              | <i>O. volvulus</i>             | Humans                            | 2,500 mg over 2 d, then 500 mg weekly for 27 weeks | Yes | Histologic, D210                                               | No visible change                                                         | 13         |
| Amodiaquine                  | <i>O. volvulus</i>             | Humans (52)                       | 15–50 mg, IN                                       | Yes | Histologic, D180                                               | Macrofilaricide (100%)                                                    | 14         |
|                              | <i>O. volvulus</i>             | Humans (3)                        | 1,800–3,000 mg over 3–10 d                         | No  | Histologic or EIW, D120–180                                    | No visible change                                                         | 41         |
|                              | <i>Litomosoides carinii</i>    | <i>Meriones unguiculatus</i> (27) | 25–100 mg/kg/d × 5 d                               | Yes | No. of live and dead worms at necropsy (15 d after first dose) | Macrofilaricide, dose effect                                              | 43         |
|                              | <i>L. carinii</i>              | <i>Sigmodon hispidus</i> (5)      | 100 mg/kg/d × 5 d                                  | Yes | No. of live and dead worms at necropsy (15 d after first dose) | Low macrofilaricidal effect                                               | 43         |
|                              | <i>L. carinii</i>              | <i>Mastomys natalensis</i> (15)   | 25–100 mg/kg/d × 5 d                               | Yes | No. of live and dead worms at necropsy (D95)                   | Less worms in treated animals; dead worms: 75% in treated, 0% in controls | 44         |
| Amodiaquine congeners        | <i>L. carinii</i>              | <i>M. natalensis</i>              | 100 mg/kg/d × 5 d                                  | Yes | Necropsy and MCD                                               | MCD > 100 mg/kg × 5                                                       | 45         |
|                              | <i>L. carinii</i>              | <i>M. unguiculatus</i>            | 25–100 mg/kg/d × 5 d                               | Yes | No. of live and dead worms at necropsy (15 d after first dose) | 10 compounds with macrofilaricidal activity                               | 47         |
|                              | <i>L. carinii</i>              | <i>M. natalensis</i>              | 100 mg/kg/d × 5 d, po or sc                        | Yes | Necropsy (date not specified)                                  | No macrofilaricidal effect                                                | 40         |
| 4-aminoquinoline derivatives | <i>Acanthocheilonema vitae</i> | <i>M. natalensis</i>              | 200 mg/kg/d × 5 days                               | Yes | Not specified                                                  | Reduction in adult load, or in females fecundity for some compounds       | 48         |

\* d = days.

† Values in parentheses are number of treated hosts.

‡ Treatment given orally (po) except when specified. IN = infiltration of nodule; sc = subcutaneous.

§ C = controlled trial (Yes) vs. non-controlled trial (No).

¶ Histologic = examination of worms in sections of nodules; EIW = examination of isolated *O. volvulus* (after collagenase digestion of nodules); MCD = minimum curative dose = dose killing more than 95% of the adult parasites; D = date (days after last dose, except when specified) of collection of nodules (for *O. volvulus*) or of necropsy (for other species).
